# Supplementary material
Source: Springer Nature journal article supplement (https://www.springermedizin.de/resource/supplementary/12876_2010_481_MOESM8_ESM.pdf/9437106)
Supplement: MOESM8 [file 9437106]

## Effect of Antiretrovirals on Cell Death at 24h

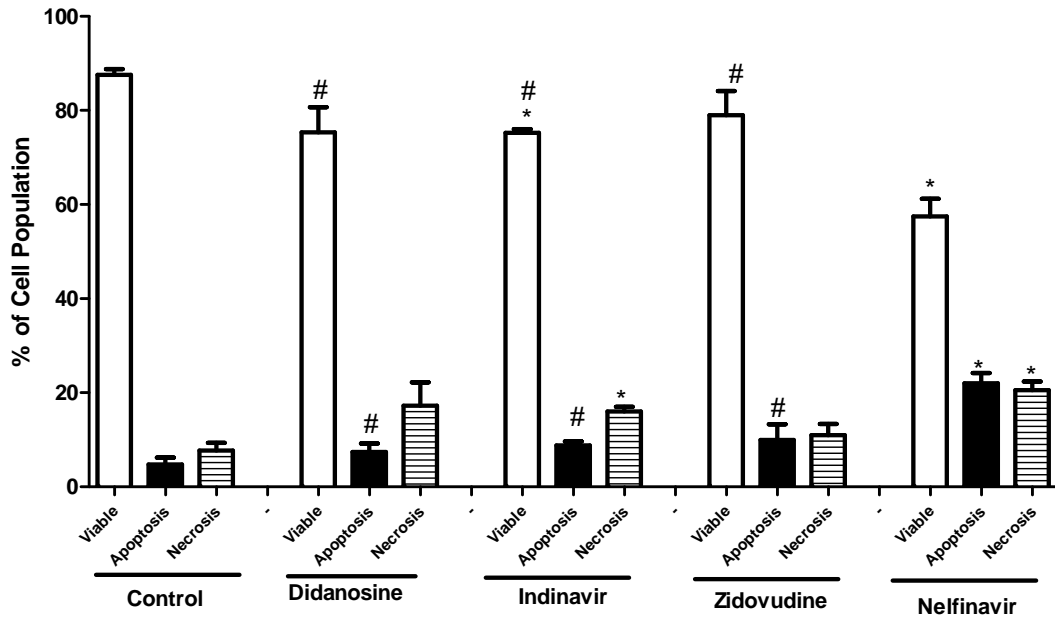

\* p < 0.05 when compared to Control

# p < 0.05 when compared to Nelfinavir
